# Supplementary material for: Identification of clinically approved small molecules that inhibit growth and affect transcript levels of developmentally regulated genes in the African trypanosome
Source: PLoS Negl Trop Dis. 2020 Mar 13;14(3):e0007790. doi: 10.1371/journal.pntd.0007790 (PMC7094864; doi:10.1371/journal.pntd.0007790)
Supplement: S10 Table — (XLSX) [file pntd.0007790.s014.xlsx]

## Sheet: Sheet1
Sample:	Mean Fluorescence Intensity GFP	Median Fluorescence Intensity GFP
A1_1,000 cells_mL AntatEP1GFP.fcs	906	609
A2_10,000 cells_mL AntatEP1GFP.fcs	2586	795
A3_100,000 cells_mL AntatEP1GFP.fcs	6479	6709
A4_1,000,000 cells_mL AntatEP1GFP.fcs	7211	7072
